# Supplementary material
Source: publisher site journal article supplement (https://www.dovepress.com/article/553576)
Supplement: Supplementary file 1 [file 553576%20Revised%20Supplementary%20Table.docx]

**Supplementary Table 1. The entry terms of Vitamin D and osteoarthritis**

| **Item** | **Entry Terms** |
| --- | --- |
| Vitamin D | "Vitamin D"; "Vit D"; "Vit-D"; "Vitamin D 3"; "Vitamin D3"; "(3 beta,5Z,7E)-9,10-Secocholesta-5,7,10(19)-trien-3-ol"; "1,25-Dihydroxyvitamin D 3"; "1,25-Dihydroxyvitamin D3"; "1,25 Dihydroxyvitamin D3"; "1,25 Dihydroxyvitamin D 3"; "1,25-Dihydroxycholecalciferol"; "1,25 Dihydroxycholecalciferol"; "Cholecalciferol"; "Cholecalciferols"; "25-Hydroxycholecalciferol"; "25 Hydroxycholecalciferol"; "25-Hydroxyvitamin D 3"; "25 Hydroxyvitamin D 3"; "25-Hydroxyvitamin D3"; "25 Hydroxyvitamin D3"; "25-Hydroxycholecalciferol Monohydrate"; "25 Hydroxycholecalciferol Monohydrate"; "Monohydrate, 25-Hydroxycholecalciferol"; "Calcifediol, (3 beta,5E,7E)-Isomer"; "Calcifediol, (3 alpha,5Z,7E)-Isomer"; "Dedrogyl"; "Calderol"; "Hidroferol"; "Calciol"; "Calcidiol"; "Calcifediol"; "Calcifediol Anhydrous"; "Anhydrous, Calcifediol"; "Calciferol"; "Calciferols"; "Ergocalciferol"; "Ergocalciferols"; "Vitamin D 2"; "Vitamin D2"; "D2, Vitamin"; "25OHD"; "25OHD2"; "25OHD3"; "25 Hydroxyvitamin D 2"; "25-Hydroxycalciferol"; "25 Hydroxycalciferol"; "25-Hydroxyergocalciferol"; "25 Hydroxyergocalciferol"; "9,10-Secoergosta-5,7,10(19),22-tetraene-3 beta,25-diol"; "Ercalcidiol"; "25-Hydroxyvitamin D2"; "25 Hydroxyvitamin D2"; "25-hydroxyvitamin D"; "1,25(OH)(2)D-3"; "1,25(OH)2D"; "1,25(OH)(2)D"; "25 hydroxyvitamin D"; "hydroxyvitamin D"; "Hypovitaminosis D"; "Rachitis"; "Rachitides"; "Rachitide"; "rickets" |
| Osteoarthritis | "Osteoarthritis"; "Osteoarthritides"; "Arthritis, Degenerative"; "Arthritides, Degenerative"; "Degenerative Arthritides"; "Degenerative Arthritis"; "Osteoarthrosis"; "Osteoarthroses"; "Osteoarthrosis Deformans"; "Arthrosis"; "Arthroses"; "Cartilage"; "Joint"; "Arthritis" |

**Supplementary Table 2. Search strategy**

| **Step** | **Contents** | **Result** |
| --- | --- | --- |
| #1 | TS=("Vitamin D" OR "Vit D" OR "Vit-D" OR "Vitamin D 3" OR "Vitamin D3" OR "(3 beta,5Z,7E)-9,10-Secocholesta-5,7,10(19)-trien-3-ol" OR "1,25-Dihydroxyvitamin D 3" OR "1,25-Dihydroxyvitamin D3" OR "1,25 Dihydroxyvitamin D3" OR "1,25 Dihydroxyvitamin D 3" OR "1,25-Dihydroxycholecalciferol" OR "1,25 Dihydroxycholecalciferol" OR "Cholecalciferol" OR "Cholecalciferols" OR "25-Hydroxycholecalciferol" OR "25 Hydroxycholecalciferol" OR "25-Hydroxyvitamin D 3" OR "25 Hydroxyvitamin D 3" OR "25-Hydroxyvitamin D3" OR "25 Hydroxyvitamin D3" OR "25-Hydroxycholecalciferol Monohydrate" OR "25 Hydroxycholecalciferol Monohydrate" OR "Monohydrate, 25-Hydroxycholecalciferol" OR "Calcifediol, (3 beta,5E,7E)-Isomer" OR "Calcifediol, (3 alpha,5Z,7E)-Isomer" OR "Dedrogyl" OR "Calderol" OR "Hidroferol" OR "Calciol" OR "Calcidiol" OR "Calcifediol" OR "Calcifediol Anhydrous" OR "Anhydrous, Calcifediol" OR "Calciferol" OR "Calciferols" OR "Ergocalciferol" OR "Ergocalciferols" OR "Vitamin D 2" OR "Vitamin D2" OR "D2, Vitamin" OR "25OHD" OR "25OHD2" OR "25OHD3" OR "25 Hydroxyvitamin D 2" OR "25-Hydroxycalciferol" OR "25 Hydroxycalciferol" OR "25-Hydroxyergocalciferol" OR "25 Hydroxyergocalciferol" OR "9,10-Secoergosta-5,7,10(19),22-tetraene-3 beta,25-diol" OR "Ercalcidiol" OR "25-Hydroxyvitamin D2" OR "25 Hydroxyvitamin D2" OR "25-hydroxyvitamin D" OR "1,25(OH)(2)D-3" OR "1,25(OH)2D" OR "1,25(OH)(2)D" OR "25 hydroxyvitamin D" OR "hydroxyvitamin D" OR "Hypovitaminosis D" OR "Rachitis" OR "Rachitides" OR "Rachitide" OR "rickets") | 105,062 |
| #2 | TS=("Osteoarthritis" OR "Osteoarthritides" OR "Arthritis, Degenerative" OR "Arthritides, Degenerative" OR "Degenerative Arthritides" OR "Degenerative Arthritis" OR "Osteoarthrosis" OR "Osteoarthroses" OR "Osteoarthrosis Deformans" OR "Arthrosis" OR "Arthroses" OR "Cartilage" OR "Joint" OR " Arthritis") | 836,555 |
| #3 | #1 AND #2 | 4,963 |
| #4 | ((DT=(Article)) AND DOP=(2005-01-01/2024-08-26)) AND LA=(English) | 29,167,982 |
| #5 | #3 AND #4 | 3,548 |
| #6 | manual screening (exclusion of retracted articles, meta-analysis, irrelevant publications and book chapters) | 401 |

**Supplementary Table 3. Authors with more than three articles on vitamin D and osteoarthritis research**

| **Rank** | **Authors** | **Articles** | **Citations** | **Total link strength** |
| --- | --- | --- | --- | --- |
| 1 | ding, changhai | 7 | 343 | 52 |
| 2 | jones, graeme | 6 | 284 | 47 |
| 3 | wluka, anita | 5 | 119 | 43 |
| 4 | rossini, maurizio | 4 | 242 | 34 |
| 5 | maggi, stefania | 4 | 189 | 38 |
| 6 | veronese, nicola | 4 | 189 | 38 |
| 7 | cicuttini, flavia m. | 4 | 184 | 25 |
| 8 | winzenberg, tania | 4 | 154 | 34 |
| 9 | dawson-hughes, bess | 4 | 106 | 42 |
| 10 | hilkens, catharien m. u. | 3 | 289 | 16 |
| 11 | guermazi, ali | 3 | 158 | 27 |
| 12 | arias-santiago, salvador | 3 | 135 | 17 |
| 13 | arrabal-polo, miguel a. | 3 | 135 | 17 |
| 14 | buendia-eisman, agustin | 3 | 135 | 17 |
| 15 | orgaz-molina, jacinto | 3 | 135 | 17 |
| 16 | mcalindon, timothy e. | 3 | 94 | 12 |
| 17 | kang, hee-gyoo | 3 | 86 | 19 |
| 18 | lee, jiyeong | 3 | 86 | 19 |
| 19 | lim, mi-kyoung | 3 | 86 | 19 |
| 20 | mun, sora | 3 | 86 | 19 |
| 21 | akune, t. | 3 | 80 | 21 |
| 22 | muraki, s. | 3 | 80 | 21 |
| 23 | yoshimura, n. | 3 | 80 | 21 |
| 24 | blizzard, leigh | 3 | 75 | 31 |
| 25 | cicuttini, flavia | 3 | 75 | 31 |
| 26 | fassio, angelo | 3 | 60 | 19 |
| 27 | gatti, davide | 3 | 60 | 19 |
| 28 | barker, tyler | 3 | 54 | 17 |
| 29 | henriksen, vanessa t. | 3 | 54 | 17 |
| 30 | momberger, nathan g. | 3 | 54 | 17 |
| 31 | rasmussen, g. lynn | 3 | 54 | 17 |
| 32 | rogers, victoria e. | 3 | 54 | 17 |
| 33 | trawick, roy h. | 3 | 54 | 17 |
| 34 | van schoor, natasja m. | 3 | 52 | 26 |
| 35 | amirkhizi, farshad | 3 | 11 | 9 |
| 36 | hamedi-shahraki, soudabeh | 3 | 11 | 9 |

**Supplementary Table 4. The top 19 highly co-cited references**

| **Rank** | **Cited reference** | **Citations** | **Total link strength** |
| --- | --- | --- | --- |
| 1 | holick mf, 2007, new engl j med, v357, p266, doi 10.1056/nejmra070553 | 66 | 136 |
| 2 | rossini m, 2010, arthritis res ther, v12, doi 10.1186/ar3195 | 39 | 147 |
| 3 | arnett fc, 1988, arthritis rheum-us, v31, p315, doi 10.1002/art.1780310302 | 38 | 80 |
| 4 | merlino la, 2004, arthritis rheum-us, v50, p72, doi 10.1002/art.11434 | 38 | 121 |
| 5 | mcalindon te, 1996, ann intern med, v125, p353, doi 10.7326/0003-4819-125-5-199609010-00001 | 35 | 76 |
| 6 | patel s, 2007, arthritis rheum, v56, p2143, doi 10.1002/art.22722 | 35 | 151 |
| 7 | cutolo m, 2006, clin exp rheumatol, v24, p702 | 33 | 147 |
| 8 | kerr gs, 2011, j rheumatol, v38, p53, doi 10.3899/jrheum.100516 | 26 | 110 |
| 9 | lane ne, 1999, arthritis rheum-us, v42, p854, doi 10.1002/1529-0131(199905)42:5<854::aid-anr3>3.0.co;2-i | 26 | 62 |
| 10 | craig sm, 2010, j rheumatol, v37, p275, doi 10.3899/jrheum.090705 | 24 | 125 |
| 11 | felson dt, 2007, arthritis rheum-us, v56, p129, doi 10.1002/art.22292 | 24 | 64 |
| 12 | holick mf, 2011, j clin endocr metab, v96, p1911, doi 10.1210/jc.2011-0385 10.1210/jc.2011-1193 | 24 | 41 |
| 13 | aletaha d, 2010, arthritis rheum-us, v62, p2569, doi 10.1002/art.27584 | 23 | 39 |
| 14 | ding c, 2009, arthritis rheum-us, v60, p1381, doi 10.1002/art.24486 | 22 | 47 |
| 15 | song gg, 2012, clin rheumatol, v31, p1733, doi 10.1007/s10067-012-2080-7 | 22 | 91 |
| 16 | haque uj, 2010, clin exp rheumatol, v28, p745 | 21 | 113 |
| 17 | arnson y, 2007, ann rheum dis, v66, p1137, doi 10.1136/ard.2007.069831 | 20 | 95 |
| 18 | kellgren jh, 1957, ann rheum dis, v16, p494, doi 10.1136/ard.16.4.494 | 20 | 27 |
| 19 | lin j, 2016, plos one, v11, doi 10.1371/journal.pone.0146351 | 20 | 46 |
